# Supplementary material
Source: PubMed Central journal article supplement (PMC7965571)
Supplement: 2418_figures.pdf [file 2418_figures.pdf]

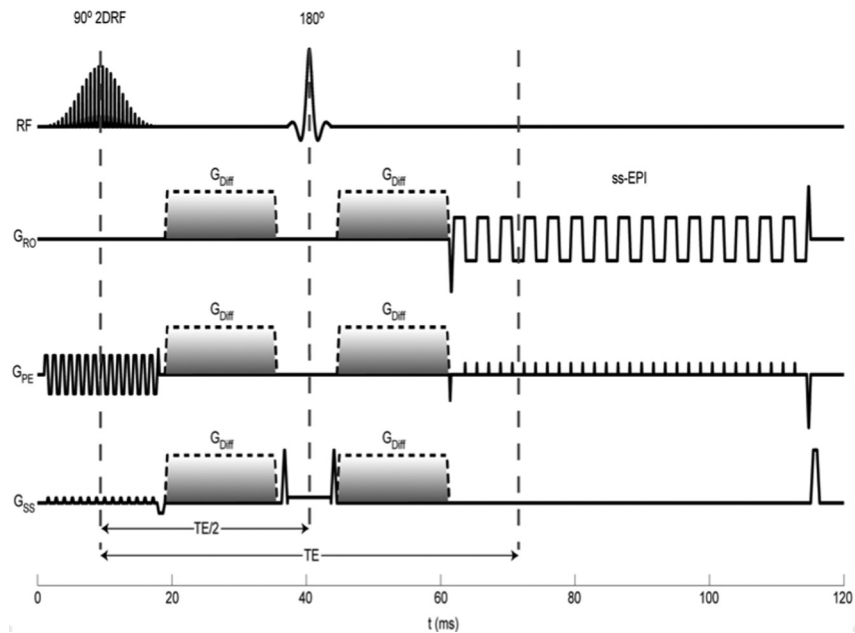

**On-line Fig 1.** Example of the pulse sequence timing diagram for the rFOV DWI sequence. Further information can be found in reference 45.

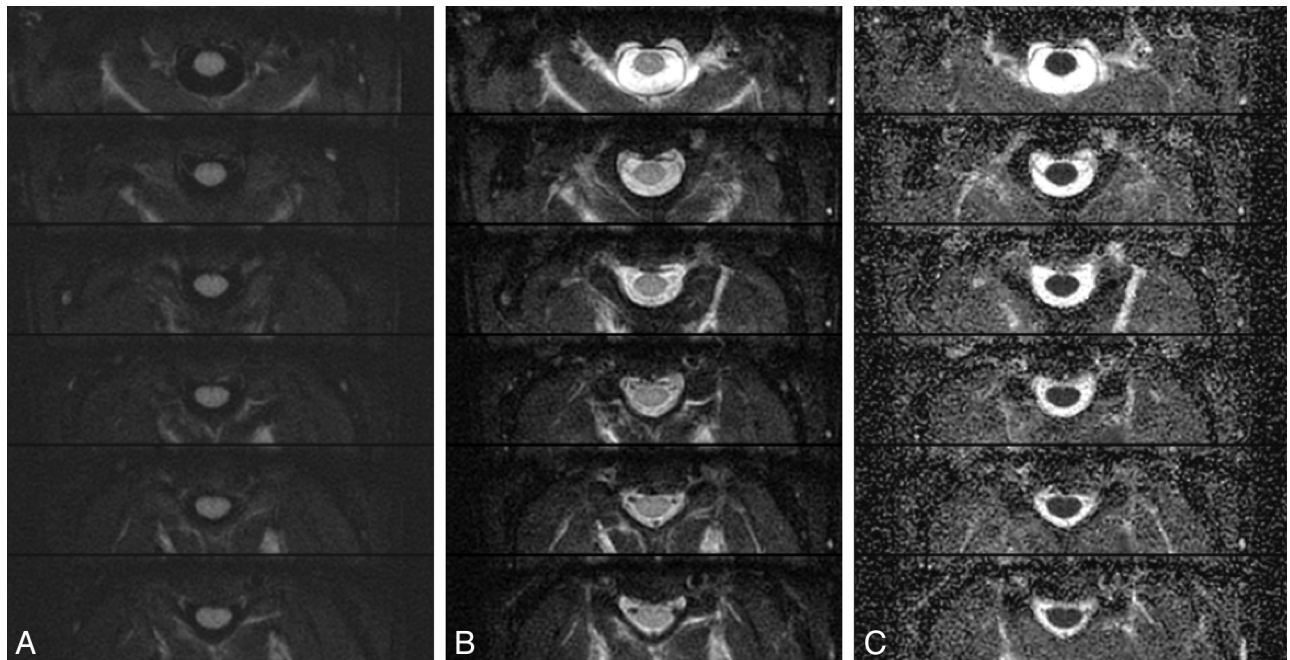

**On-line Fig 2.** Example of axial rFOV DWI in a 53-year-old man with history of trauma: isoDWI (A), B0 (B), and ADC images (C) demonstrate less distortion than our standard fFOV axial imaging. Six 6-mm-thick sections could be acquired, such that it was necessary to focus the axial examination to a specific ROI based on prior sagittal images.

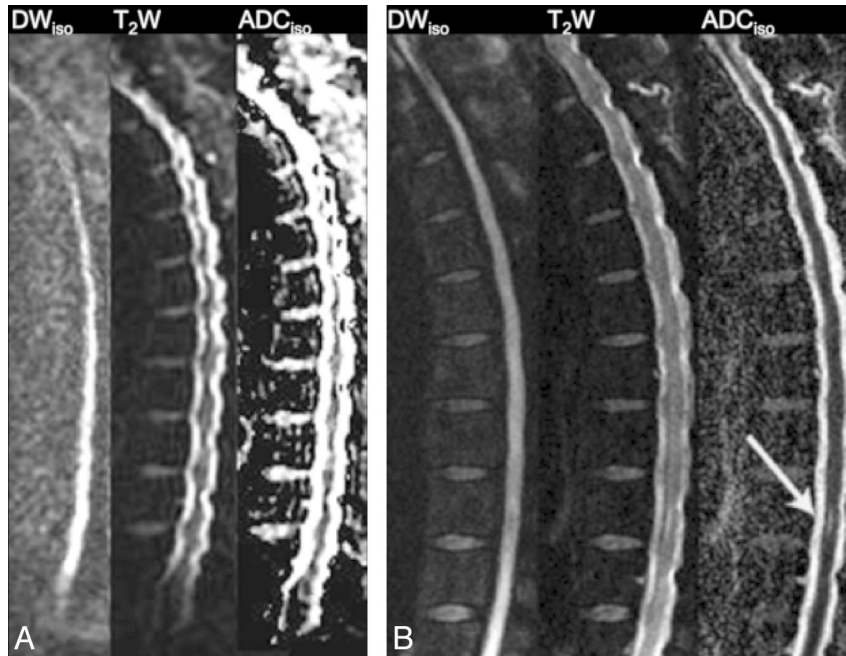

**On-line Fig 3.** A 49-year-old man who had a thoracic spine MR imaging examination to evaluate lumbar nerve sheath tumors. rFOV DWI (A) compared with fFOV DWI (B). The rFOV image demonstrates higher spatial resolution and reduced susceptibility artifacts. This allows the identification of a small central fluid structure (arrow) with low DWI signal intensity and high ADC signal intensity in the distal thoracic spinal cord, the terminal ventricle, on the rFOV images.

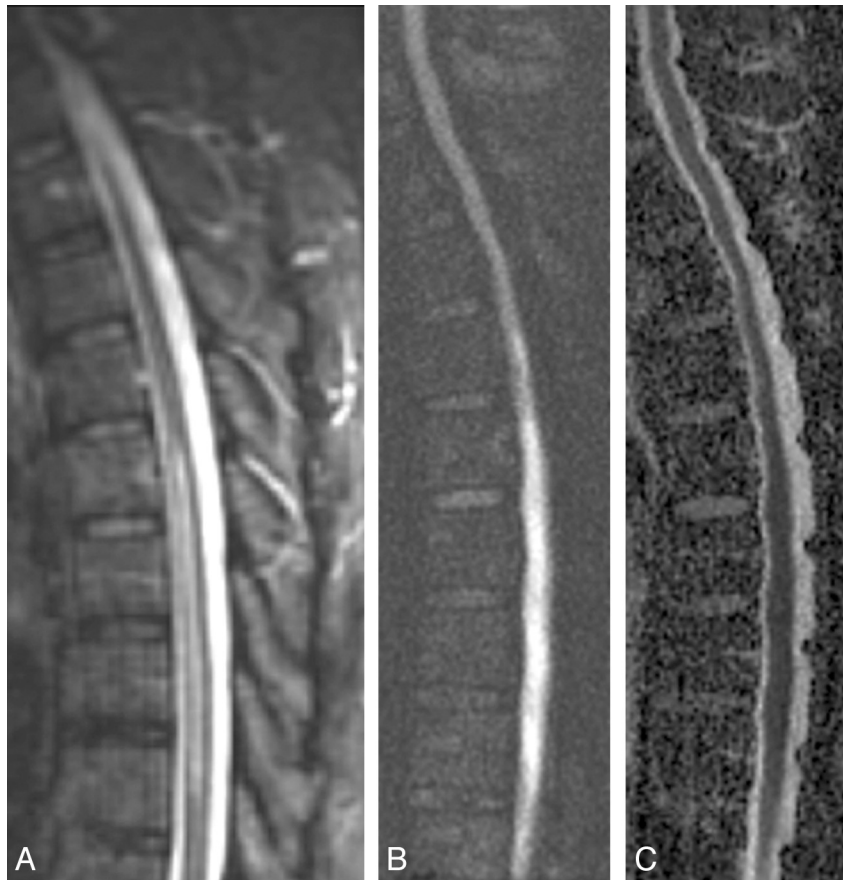

**On-line Fig 4.** A 57-year-old man with known type B aortic dissection and more recent history of acute onset paraparesis and chest pain radiating to back. A, STIR image demonstrates central high signal intensity between T5 and T8. B, rFOV DWI demonstrates high signal intensity in the same region, with corresponding low ADC values (C).
